# Supplementary material for: Narrow-band green emission of Eu2+ in a rigid tunnel structure: site occupations, barycenter energy calculations and luminescence properties
Source: Royal Society of Chemistry journal article supplement (doi:10.1039/c9qi01135h), 2019-01-01
Supplement: c9qi01135h1.pdf [file c9qi01135h1.pdf]

Table S1 Refinement and structure parameters of the CKNLLSO sample

| Compound                  | CKNLLSO (ICSD #74863) | CKNLLSO sample |
|---------------------------|-----------------------|----------------|
| Space Group               | <i>I4/m</i>           | <i>I4/m</i>    |
| <i>a</i> , Å              | 11.020(6)             | 11.0250(1)     |
| <i>c</i> , Å              | 6.379(5)              | 6.3775(2)      |
| <i>V</i> , Å <sup>3</sup> | 774.67                | 775.19         |
| <i>Z</i>                  | 2                     | 2              |
| 2θ-interval,°             | -                     | 10-130         |

Table S2 Fractional atomic coordinates and isotropic displacement paramters (Å<sup>2</sup>) of the CKNLLSO sample

| Atom | Wyck. | x          | y          | z          | Biso       |
|------|-------|------------|------------|------------|------------|
| Cs   | 2a    | 0          | 0          | 0          | 0.0650(31) |
| K    | 2b    | 0          | 0          | 0.5        | 0.078(8)   |
| Na   | 4d    | 0.5        | 0          | 0.25       | 0.012(6)   |
| Li1  | 16i   | 0.1144(22) | 0.2447(17) | 0.257(5)   | 0.090(8)   |
| Li2  | 8h    | 0.7121(25) | 0.9247(28) | 0          | 0.013(10)  |
| Li3  | 4c    | 0.5        | 0          | 0          | 0.034(11)  |
| Si   | 8h    | 0.2154(10) | 0.4213(15) | 0          | 0.097(5)   |
| O1   | 8h    | 0.4386(23) | 0.1638(23) | 0          | 0.019(12)  |
| O2   | 8h    | 0.0973(16) | 0.3312(22) | 0          | 0.014(12)  |
| O3   | 16i   | 0.7949(6)  | 0.9029(7)  | 0.2850(14) | 0.0047(21) |

Table S3 Main Bond lengths (Å) of the CKNLLSO sample

| <b>Chemical bond</b> | <b>Bond length</b> | <b>Count</b> |
|----------------------|--------------------|--------------|
| <b>Cs-O3</b>         | 3.0924             | 8            |
| <b>K-O3</b>          | 2.8529             | 8            |
| <b>Na-O1</b>         | 2.5023             | 4            |
| <b>Na-O2</b>         | 2.6751             | 4            |
| <b>Li1-O1</b>        | 1.9393             | 1            |
| <b>Li1-O2</b>        | 1.9056             | 1            |
| <b>Li1-O3</b>        | 1.9183             | 1            |
| <b>Li1-O3</b>        | 2.3790             | 1            |
| <b>Li2-O1</b>        | 1.9268             | 1            |
| <b>Li2-O2</b>        | 1.9619             | 1            |
| <b>Li2-O3</b>        | 2.0481             | 2            |
| <b>Li3-O1</b>        | 2.1481             | 2            |
| <b>Li3-O2</b>        | 2.4814             | 2            |
| <b>Si-O1</b>         | 1.6460             | 1            |
| <b>Si-O2</b>         | 1.6377             | 1            |
| <b>Si-O3</b>         | 1.6400             | 2            |
